## Index to Volume 49

### Articles

|                                                                                                                                                                                                                                                                                                                                                                                   |     |
|-----------------------------------------------------------------------------------------------------------------------------------------------------------------------------------------------------------------------------------------------------------------------------------------------------------------------------------------------------------------------------------|-----|
| <b>Angel, M. V., and Hargreaves, P. M.</b> Large-scale patterns in the distribution of planktonic and micronektonic biomass in the north-east Atlantic .....                                                                                                                                                                                                                      | 403 |
| <b>Aristizabal Abud, E. O., Prenski, L. B., and Daleo, G. R.</b> Growth and energy budget in juvenile croaker ( <i>Micropogonias furnieri</i> (Desmarest 1823)) .....                                                                                                                                                                                                             | 65  |
| <b>Arnold, G. P., and Greer Walker, M.</b> Vertical movements of cod ( <i>Gadus morhua</i> L.) in the open sea and the hydrostatic function of the swimbladder .....                                                                                                                                                                                                              | 357 |
| <b>Bailey, K. M., and Spring, S. M.</b> Comparison of larval, age-0 juvenile and age-2 recruit abundance indices of walleye pollock, <i>Theragra chalcogramma</i> , in the western Gulf of Alaska .....                                                                                                                                                                           | 297 |
| <b>Baumont, A. R., and Barnes, D. A.</b> Aspects of veliger larval growth and byssus drifting of the spat of <i>Pecten maximus</i> and <i>Aequipecten (Chlamys) opercularis</i> .....                                                                                                                                                                                             | 417 |
| <b>Bergman, M. J. N., and Hup, M.</b> Mini-Symposium on the Benthic Ecology of the North Sea: Direct effects of beamtrawling on macrofauna in a sandy sediment in the southern North Sea .....                                                                                                                                                                                    | 5   |
| <b>Brunetti, N. E., and Ivanovic, M. L.</b> Distribution and abundance of early life stages of squid ( <i>Illex argentinus</i> ) in the south-west Atlantic .....                                                                                                                                                                                                                 | 175 |
| <b>Chaput, G. J., LeBlanc, C. H., and Bourque, C.</b> Evaluation of an electronic fish measuring board .....                                                                                                                                                                                                                                                                      | 335 |
| <b>Christensen, I., Haug, T., and Øien, N.</b> Seasonal distribution, exploitation and present abundance of stocks of large baleen whales (Mysticeti) and sperm whales ( <i>Physeter macrocephalus</i> ) in Norwegian and adjacent waters .....                                                                                                                                   | 341 |
| <b>Chu, D., Stanton, T. K., and Wiebe, P. H.</b> Frequency dependence of sound backscattering from live individual zooplankton .....                                                                                                                                                                                                                                              | 97  |
| <b>Cushing, D. H.</b> A short history of the Downs stock of herring .....                                                                                                                                                                                                                                                                                                         | 437 |
| <b>Davaine, P., and Beall, E.</b> Relationships between temperature, population density, and growth in a sea trout population ( <i>S. trutta</i> L.) of the Kerguelen Islands .....                                                                                                                                                                                               | 445 |
| <b>dos Santos, J., and Jobling, M.</b> A model to describe gastric evacuation in cod ( <i>Gadus morhua</i> L.) fed natural prey .....                                                                                                                                                                                                                                             | 145 |
| <b>Engås, A., and Soldal, A. V.</b> Diurnal variations in bottom trawl catch rates of cod and haddock and their influence on abundance indices .....                                                                                                                                                                                                                              | 89  |
| <b>Farebrother, R. W.</b> A simulation study of three iterated weighted least-squares estimators of mortality rates from single-release tagging studies .....                                                                                                                                                                                                                     | 185 |
| <b>Fossum, P.</b> The recovery of the Barents Sea capelin ( <i>Mallotus villosus</i> ) from a larval point of view .....                                                                                                                                                                                                                                                          | 237 |
| <b>Heip, C., Basford, D., Craeymeersch, J. A., Dewarumez, J.-M., Dörjes, J., de Wilde, P., Duineveld, G., Eleftheriou, A., Herman, P. M. J., Niermann, U., Kingston, P., Künitzer, A., Racher, E., Rumohr, H., Soetaert, K., and Soltwedel, T.</b> Mini-Symposium on the Benthic Ecology of the North Sea: Trends in biomass, density and diversity of North Sea macrofauna ..... | 13  |
| <b>Hop, H., Gjøseter, J., and Danielssen, D. S.</b> Seasonal feeding ecology of cod ( <i>Gadus morhua</i> L.) on the Norwegian Skagerrak coast .....                                                                                                                                                                                                                              | 453 |
| <b>Horbowy, J.</b> The differential alternative to the Deriso difference production model .....                                                                                                                                                                                                                                                                                   | 167 |
| <b>Huys, R., Herman, P. M. J., Heip, C. H. R., and Soetaert, K.</b> Mini-Symposium on the Benthic Ecology of the North Sea: The meiobenthos of the North Sea: density, biomass trends and distribution of copepod communities .....                                                                                                                                               | 23  |
| <b>Jakobsen, T.</b> Biological reference points for North-East Arctic cod and haddock .....                                                                                                                                                                                                                                                                                       | 155 |
| <b>Jørgensen, T.</b> Long-term changes in growth of North-East Arctic cod ( <i>Gadus morhua</i> ) and some environmental influences .....                                                                                                                                                                                                                                         | 263 |
| <b>Kallio-Nyberg, I., and Ikonen, E.</b> Migration pattern of two salmon stocks in the Baltic Sea .....                                                                                                                                                                                                                                                                           | 191 |
| <b>Kingston, P. F.</b> Mini-Symposium on the Benthic Ecology of the North Sea: Impact of offshore oil production installations on the benthos of the North Sea .....                                                                                                                                                                                                              | 45  |

|                                                                                                                                                                                                                                                                                                             |          |
|-------------------------------------------------------------------------------------------------------------------------------------------------------------------------------------------------------------------------------------------------------------------------------------------------------------|----------|
| <b>Küntzer, A., Basford, D., Craeymeersch, J. A., Dewaromez, J. M., Dörjes, J., Duineveld, G. C. A., Eleftheriou, A., Heip, C., Herman, P., Kingston, P., Niermann, U., Rachor, E., Rumohr, H., and de Wilde, P. A. J.</b> The benthic infauna of the North Sea: species distribution and assemblages ..... | 127      |
| <b>Large, P. A.</b> Use of a multiplicative model to estimate relative abundance from commercial CPUE data .....                                                                                                                                                                                            | 253      |
| <b>Lo, N. C.-h., Hunter, J. R., Moser, H. G., Smith, P. E., and Methot, R. D.</b> The daily fecundity reduction method: a new procedure for estimating adult fish biomass .....                                                                                                                             | 209      |
| <b>MacLennan, D. N., Shepherd, J. G., Pope, J. G., and Gislason, H.</b> Fishing mortality and the variation of catches: a time series approach .....                                                                                                                                                        | 425      |
| <b>Markussen, N. H., Ryg, M., and Lydersen, C.</b> Food consumption of the NE Atlantic minke whale ( <i>Balaenoptera acutorostrata</i> ) population estimated with a simulation model .....                                                                                                                 | 317      |
| <b>Misund, O. A., and Aglen, A.</b> Swimming behaviour of fish schools in the North Sea during acoustic surveying and pelagic trawl sampling .....                                                                                                                                                          | 325      |
| <b>Misund, O. A., Aglen, A., Beltestad, A. K., and Dalen, J.</b> Relationships between the geometric dimensions and biomass of schools .....                                                                                                                                                                | 305      |
| <b>Moksness, E.</b> Differences in otolith microstructure and body growth rate of North Sea herring ( <i>Clupea harengus</i> L.) larvae in the period 1987–1989 .....                                                                                                                                       | 223      |
| <b>Moksness, E.</b> Validation of daily increments in the otolith microstructure of Norwegian spring-spawning herring ( <i>Clupea harengus</i> L.) .....                                                                                                                                                    | 231      |
| <b>Moksness, E., and Fossum, P.</b> Daily growth rate and hatching-date distribution of Norwegian spring-spawning herring ( <i>Clupea harengus</i> L.) .....                                                                                                                                                | 217      |
| <b>Möller, H., and Anders, K.</b> Epidemiology of fish diseases in the Wadden Sea .....                                                                                                                                                                                                                     | 199      |
| <b>O'Connell, M. F., Dempson, J. B., and Reddin, D. G.</b> Evaluation of the impacts of major management changes in the Atlantic salmon ( <i>Salmo salar</i> L.) fisheries of Newfoundland and Labrador, Canada, 1984–1988. ....                                                                            | 69       |
| <b>Paul, A. J., Paul, J. M., and Smith, R. L.</b> Energy and ration requirements of flathead sole ( <i>Hippoglossoides elassodon</i> Jordan and Gilbert 1880) based on energy consumption and growth .....                                                                                                  | 413      |
| <b>Pelletier, D., and Laurec, A.</b> Management under uncertainty: defining strategies for reducing overexploitation. ....                                                                                                                                                                                  | 389      |
| <b>Rees, H. L., Rowlatt, S. M., Lambert, M. A., Lees, R. G., and Limpenny, D. S.</b> Mini-Symposium on the Benthic Ecology of the North Sea: Spatial and temporal trends in the benthos and sediments in relation to sewage sludge disposal off the northeast coast of England .....                        | 55       |
| <b>Reeves, S. A., Armstrong, D. W., Fryer, R. J., and Coull, K. A.</b> The effects of mesh size, cod-end extension length and cod-end diameter on the selectivity of Scottish trawls and seines .....                                                                                                       | 279      |
| <b>Robb, A. P.</b> Changes in the gall bladder of whiting ( <i>Merlangius merlangus</i> ) in relation to recent feeding history .....                                                                                                                                                                       | 431      |
| <b>Rosenberg, A. A., Kirkwood, G. P., Cook, R. M., and Myers, R. A.</b> Combining information from commercial catches and research surveys to estimate recruitment: a comparison of methods .....                                                                                                           | 379      |
| <b>Turrell, W. R.</b> New hypotheses concerning the circulation of the northern North Sea and its relation to North Sea fish stock recruitment. ....                                                                                                                                                        | 107      |
| <b>Editorial</b> .....                                                                                                                                                                                                                                                                                      | 1        |
| <b>Reviews</b> .....                                                                                                                                                                                                                                                                                        | 251, 337 |
| <b>Short notes</b>                                                                                                                                                                                                                                                                                          |          |
| <b>St-Pierre, G.</b> Visual determination of sex in live Pacific halibut .....                                                                                                                                                                                                                              | 373      |
| <b>Ueberschär, B., and Clemmesen, C.</b> A comparison of the nutritional condition of herring larvae as determined by two biochemical methods—tryptic enzyme activity and RNA/DNA ratio measurements .....                                                                                                  | 245      |
| <b>Referees to Volume 49</b> .....                                                                                                                                                                                                                                                                          | 463      |
| <b>Index to Volume 49</b> .....                                                                                                                                                                                                                                                                             | 465      |
